# Supplementary material
Source: publisher site journal article supplement (https://www.dovepress.com/article/360715)
Supplement: Supplementary file 1 [file get_supplementary_file.php]

**Table S1.** Seven plasmids identified in DY2009.

| Plasmid | Length (bp) | Form | Plasmid type |
| --- | --- | --- | --- |
| pDY2009-1 | 258,982 | Circular | IncFIB, IncFII |
| pDY2009-2 | 111,846 | Circular | IncFIB |
| pDY2009-3 | 71,802 | Circular | IncFII |
| pDY2009-NDM-1 | 44,579 | Circular | IncX3 |
| pDY2009-MCR-1 | 33,309 | Circular | IncX4 |
| pDY2009-6 | 4,092 | Circular | Col440II |
| pDY2009-7 | 4,018 | Circular | ND |

ND, not detected
